# Supplementary material for: Accelerated microrockets with a biomimetic hydrophobic surface
Source: Royal Society of Chemistry journal article supplement (doi:10.1039/c6ra17066h), 2016-01-01
Supplement: c6ra17066h1.pdf [file c6ra17066h1.pdf]

## Electronic Supplementary Information

### Accelerated Microrockets with Biomimetic Hydrophobic Surface

Xiaocong Chang, Longqiu Li\*, Tianlong Li, Dekai Zhou, and Guangyu Zhang

\*longqiuli@hit.edu.cn

*State Key Laboratory for Robotics and System, Harbin Institute of Technology, Harbin 150001, P. R. China*

## 1. Supporting Videos

SI Video 1. Motion of microrocket before being self-assembled with LSE 1-Dodecanethiol hydrophobic molecular layer in acid solution.

SI Video 2. Motion of microrocket after being self-assembled with LSE 1-Dodecanethiol hydrophobic molecular layer in acid solution.

## 2. Supporting Figures

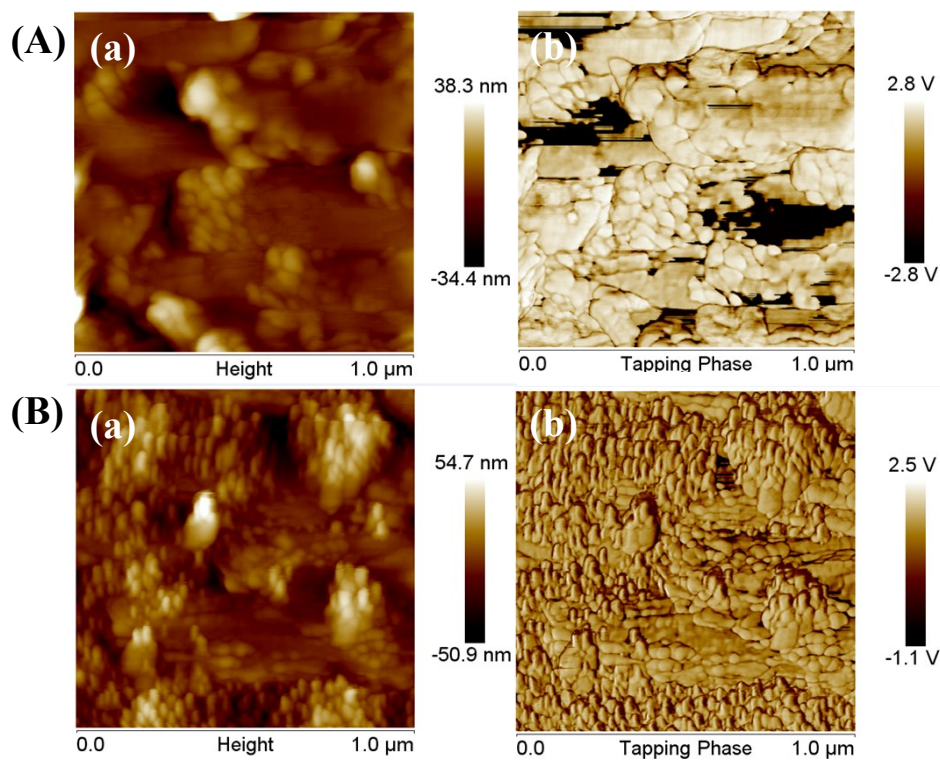

Figure S1. AFM images of the PANI layer before and after being self-assembled with LSE 1-Dodecanethiol layer: (A) without hydrophobic molecular layer and (B) with hydrophobic molecular layer. (a) AFM height images and (b) AFM phase images.

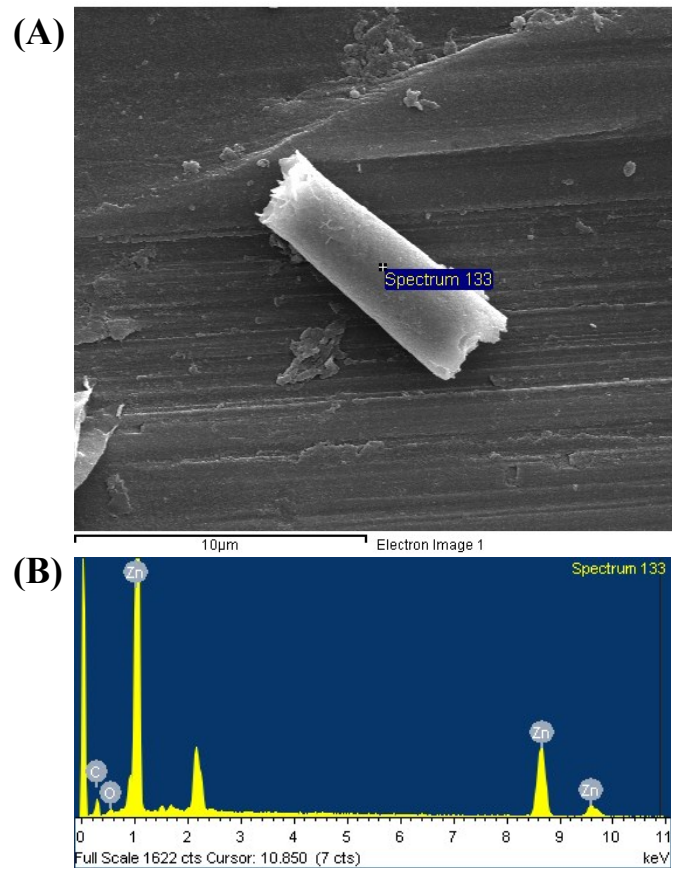

Figure S2. EDX spectra for each elements on the surface of microrocket.
